# Supplementary material
Source: Springer Nature journal article supplement (https://www.springermedizin.de/resource/supplementary/12974_2010_349_MOESM1_ESM.pdf/9601480)

A

TLR-1

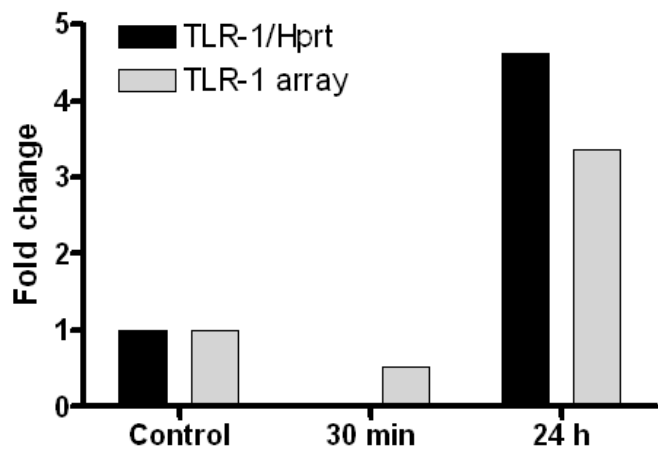

B

TLR-2

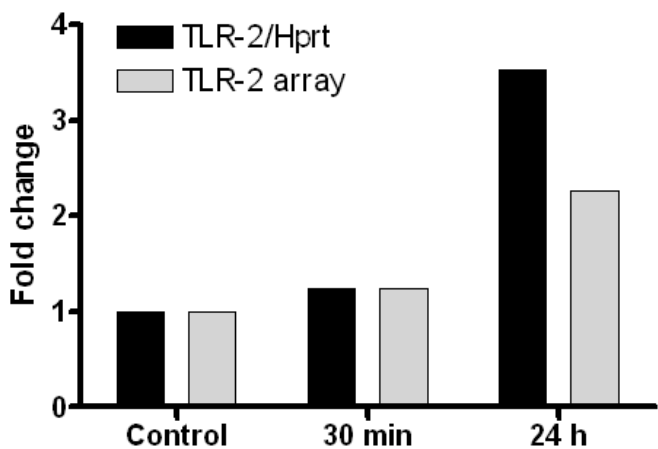

Supplement: MOESM1 [file 9601480]
